# Supplementary material for: Influence of Lipoxygenase Inhibition on Glioblastoma Cell Biology
Source: MDPI journal article supplement (doi:10.3390/ijms21218395), 2020-11-09
Supplement: s1 [file s1]

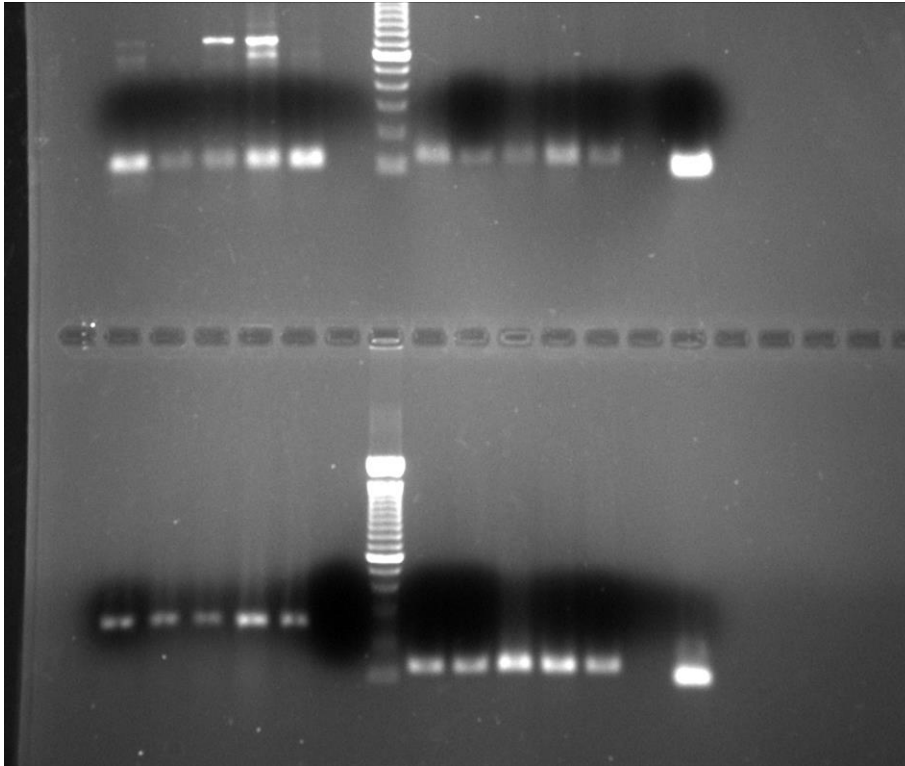

Figure 2B- Top left 15LOX1; Top right 15LOX2; Bottom left GRP132; *Bottom right another gene and is not relevant.*

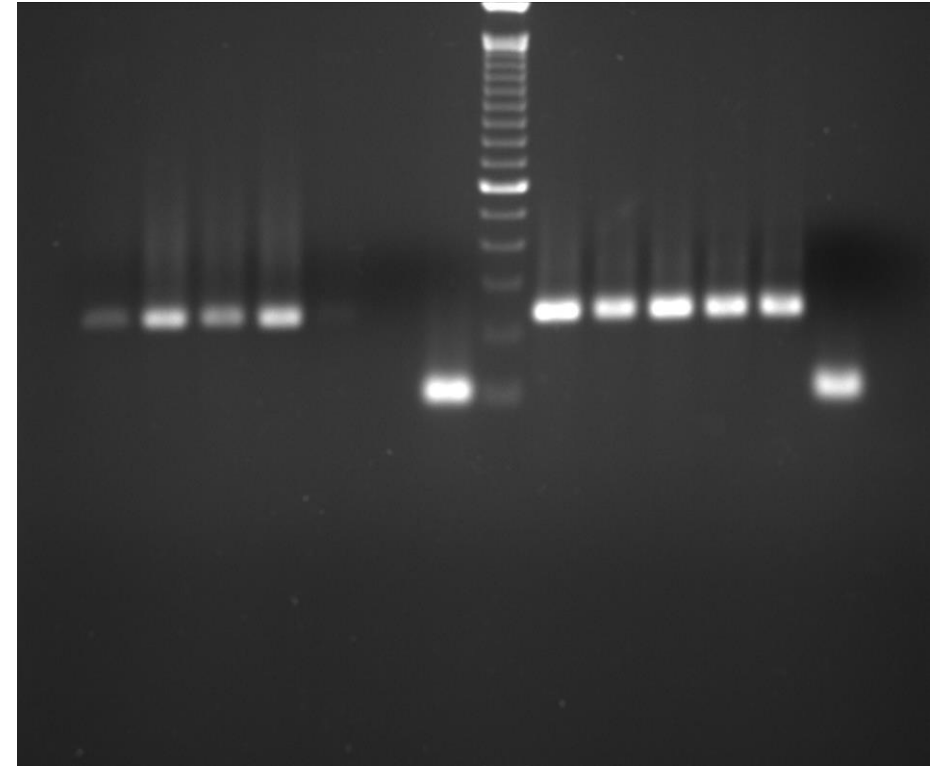

Figure 2B PPAR Gamma and PPAR Beta/Delta

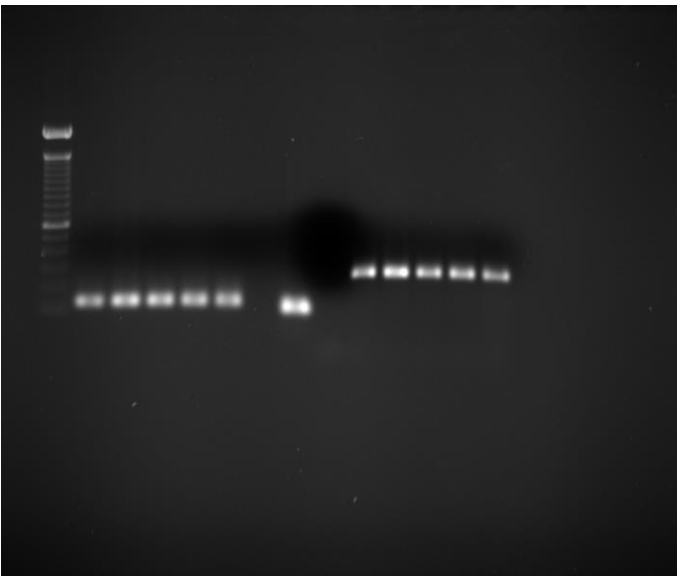

Figure 7A Left/Center

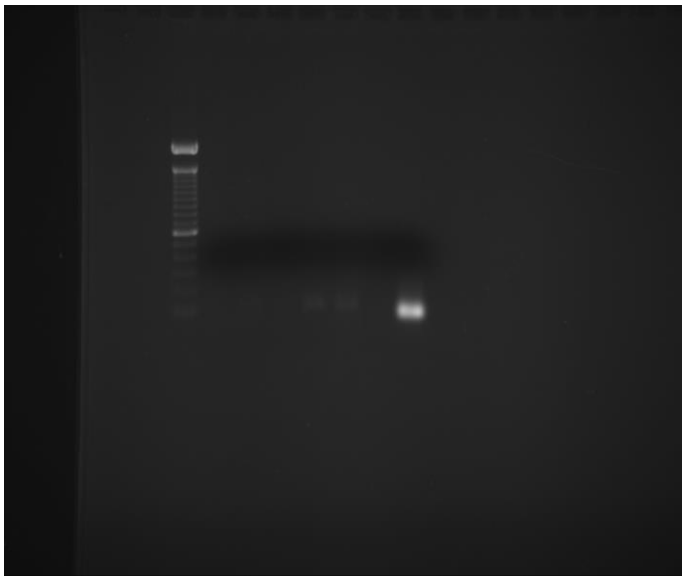

Figure 7A Right

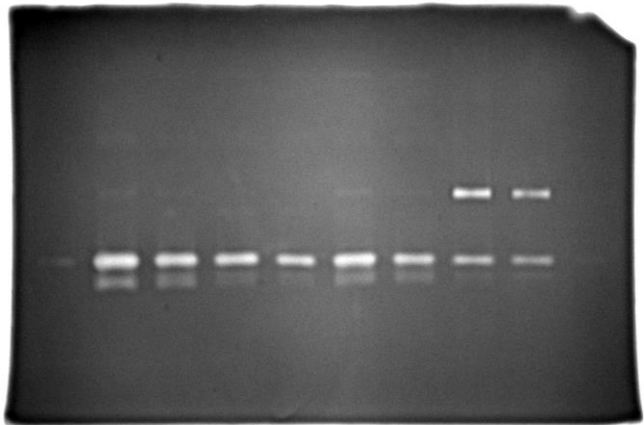

Figure 7E

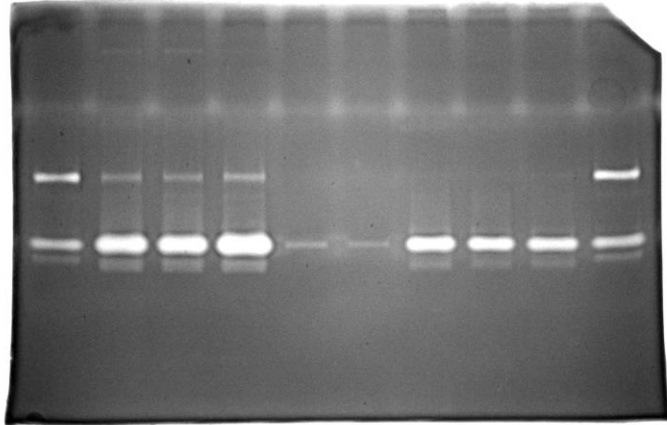

Figure 7F – Right half of the gel.  
*The left side of gel is another cell line and is not relevant.*

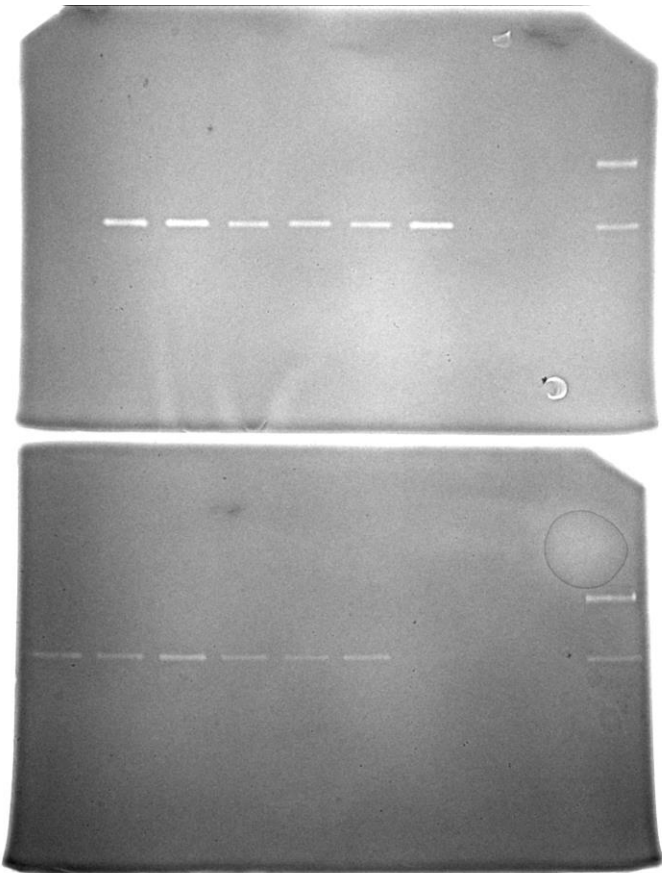

Figure 7H

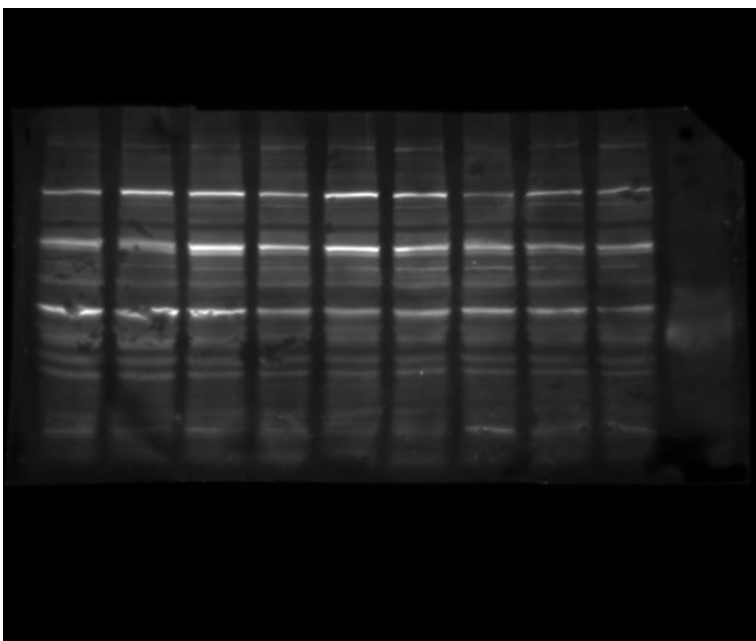

Figure 8A Run1. 15-LOX

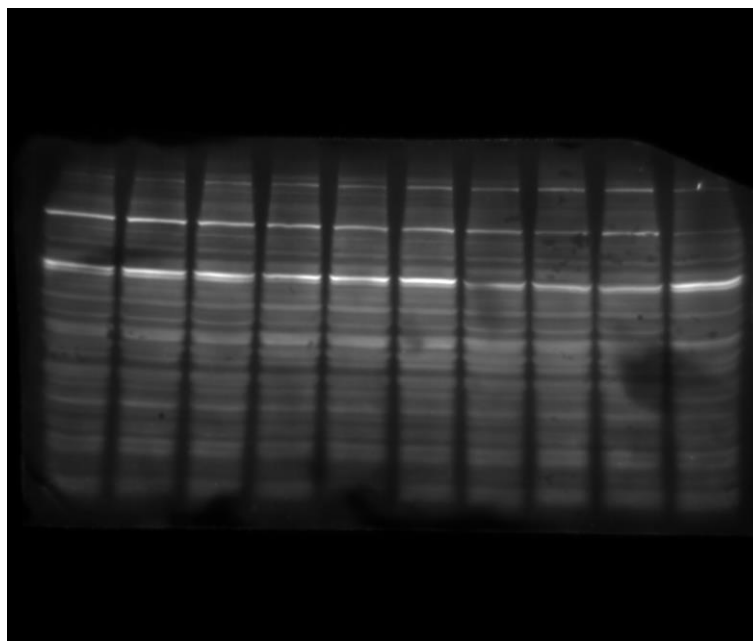

Figure 8B Run1. 15-LOX

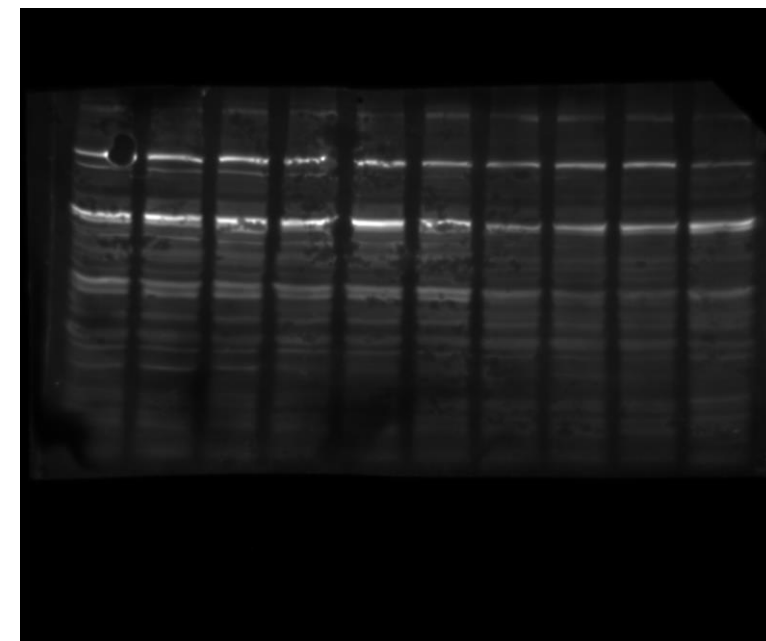

Figure 8B Run2. 15-LOX

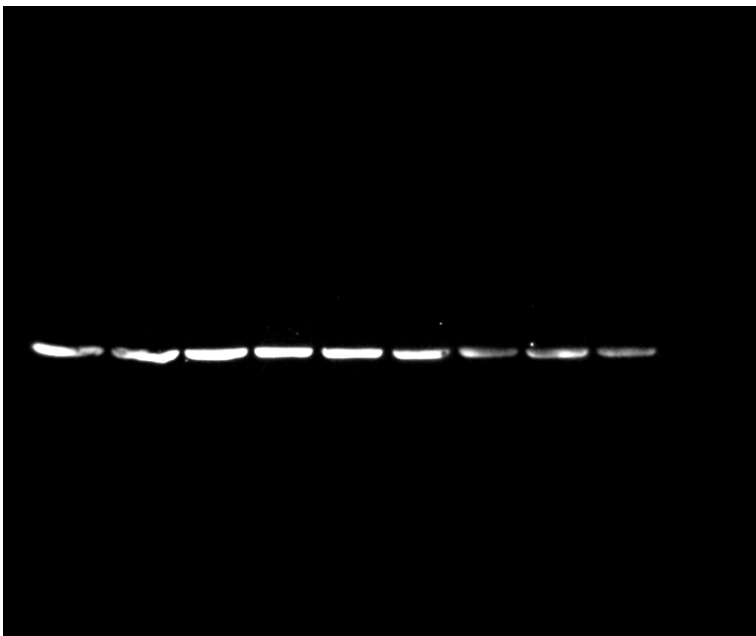

Figure 8A Run1. B-actin

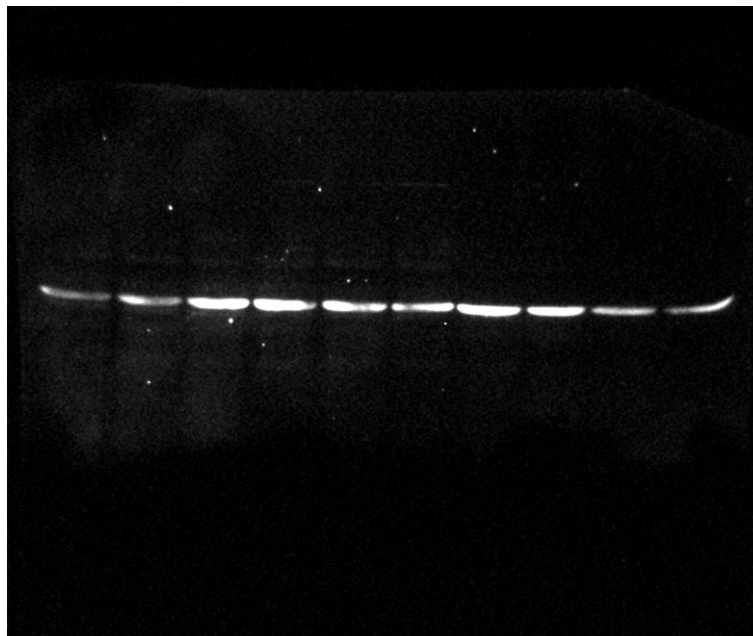

Figure 8B Run1. B-actin

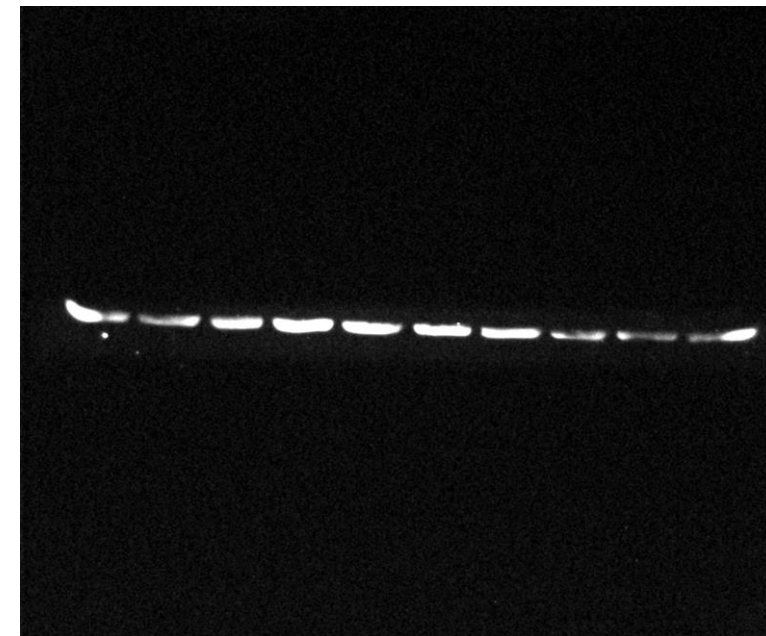

Figure 8B Run2. B-actin
