# Supplementary material for: Influence of Lipoxygenase Inhibition on Glioblastoma Cell Biology
Source: MDPI journal article supplement (doi:10.3390/ijms21218395), 2020-11-09
Supplement: s1 [file s1]

## Supplementary Material

### LIPOXYGENASE PROFILE, ACTIVITY AND MODULATION IN GLIOBLASTOMA CELL LINES

Felipe da Costa Souza<sup>¶\*</sup>, Matthew Thomas Ferreira<sup>¶</sup>, Alison Colquhoun

Department of Cell and Developmental Biology, Institute of Biomedical Sciences,  
University of São Paulo, São Paulo, Brazil.

<sup>¶</sup>These authors contributed equally to this work and share co-first authorship.

\*Corresponding author: f.dcsouza@gmail.com

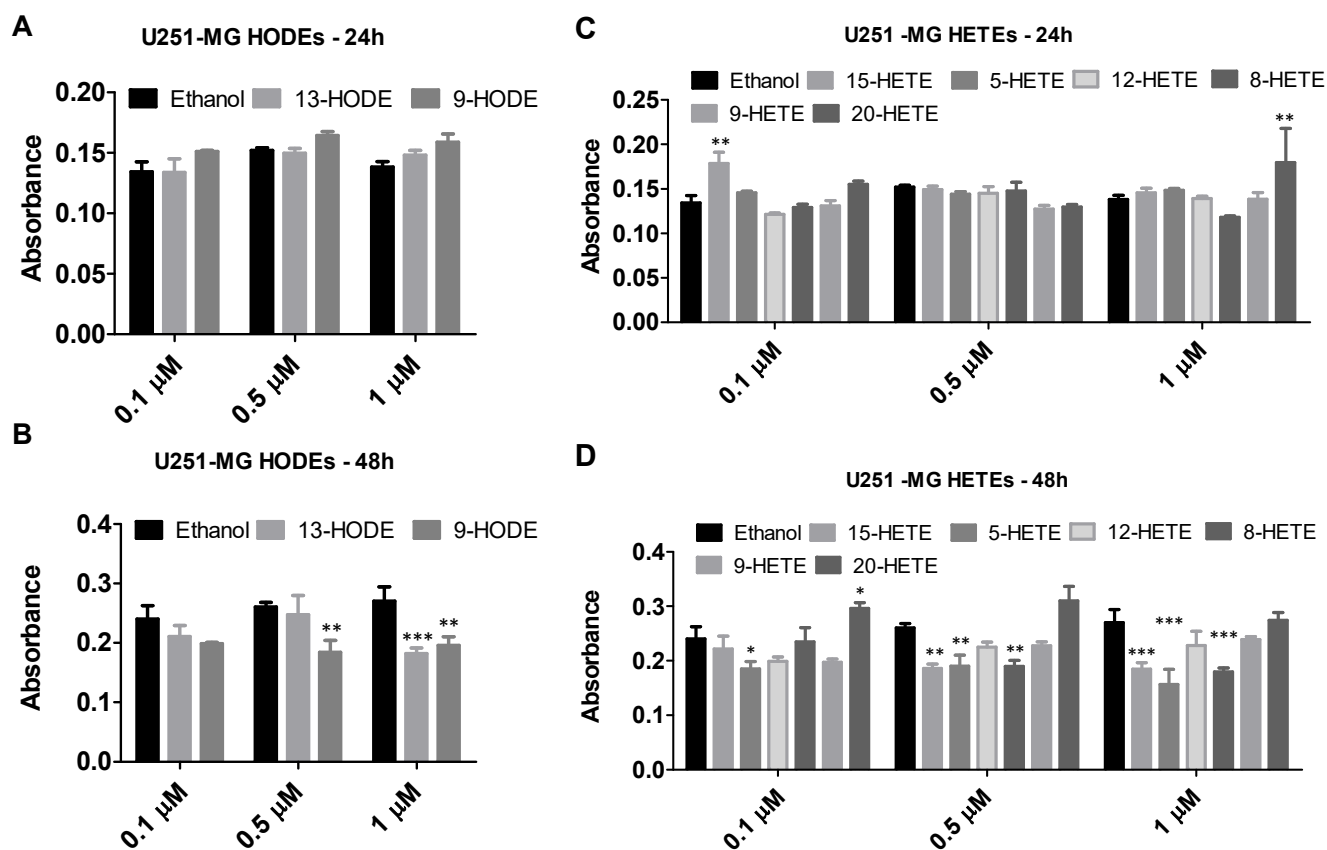

**Supplementary 1. Cell viability of U251-MG treated with exogenous lipids by MTT (A, B, C, D).** Histograms show MTT absorbance after 24 and 48 hours of treatment with a HODE (A and B) and HETE (C and D) panel. Significance was found only for some of treatments, mostly at 48h.  $p < 0.05$  (\*),  $p < 0.01$  (\*\*),  $p < 0.001$  (\*\*\*). N = 3, in duplicate.

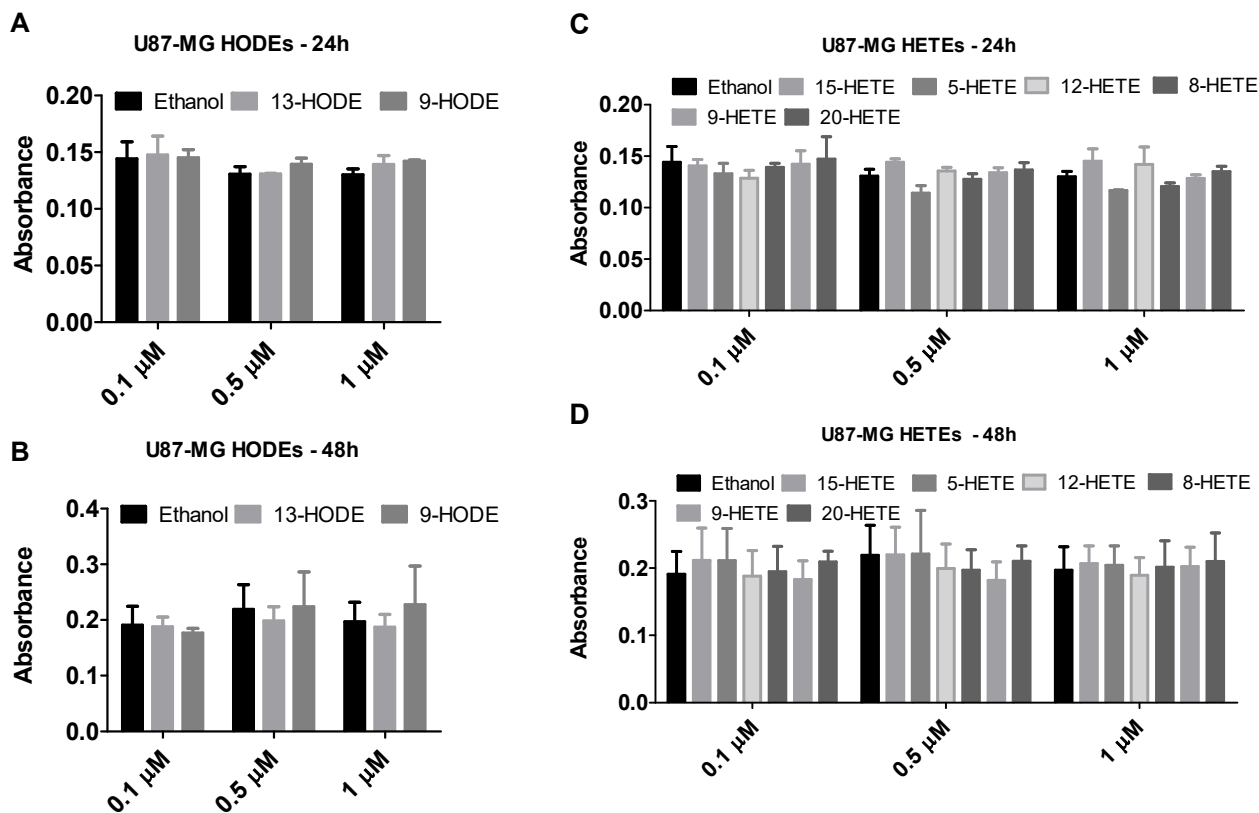

**Supplementary 2. Cell viability of U87-MG treated with exogenous lipids by MTT (A, B, C, D).** Histograms show MTT absorbance after 24 and 48 hours of treatment with a HODE (A and B) and HETE (C and D) panel. No significance was found with any of the treatments. N = 3, in duplicate.

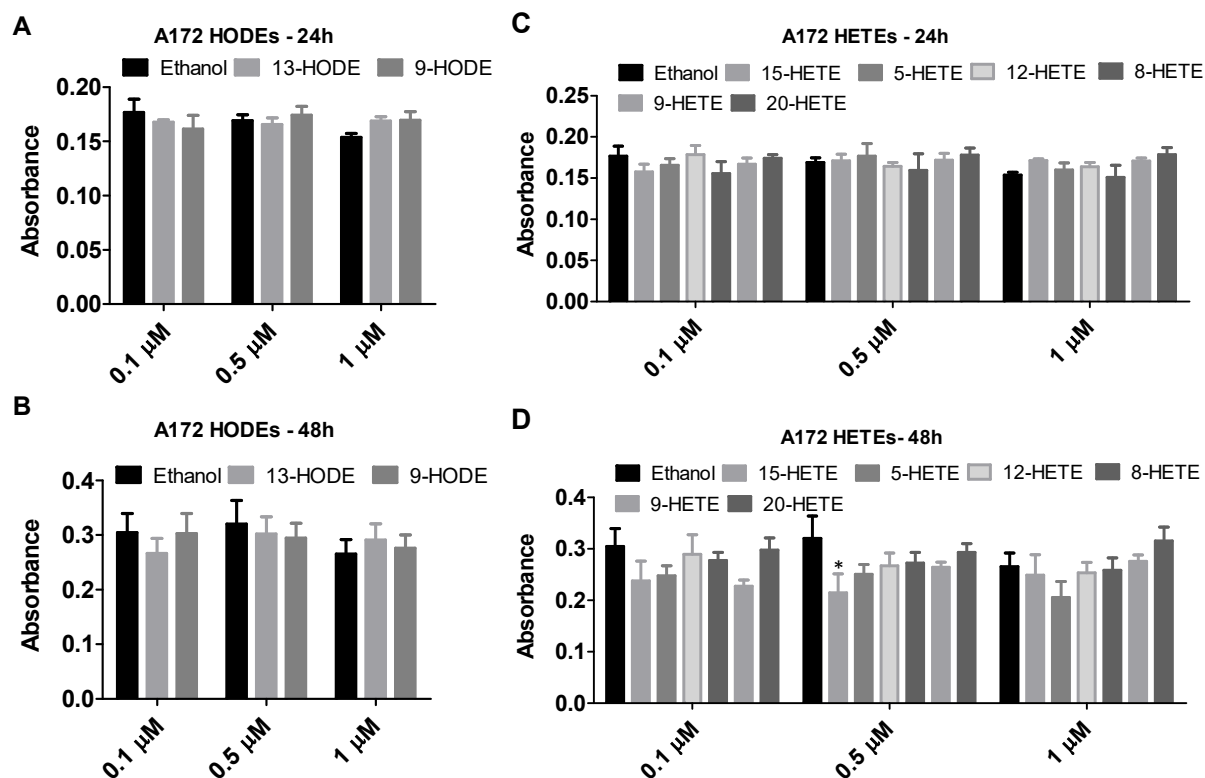

**Supplementary 3. Cell viability of A172 treated with exogenous lipids by MTT (A, B, C, D).** Histograms show MTT absorbance after 24 and 48 hours of treatment with a HODE (A and B) and HETE (C and D) panel. No significance was found with any of the treatments.  $p < 0.05$  (\*).  $N = 3$ , in duplicate.

## U251-MG

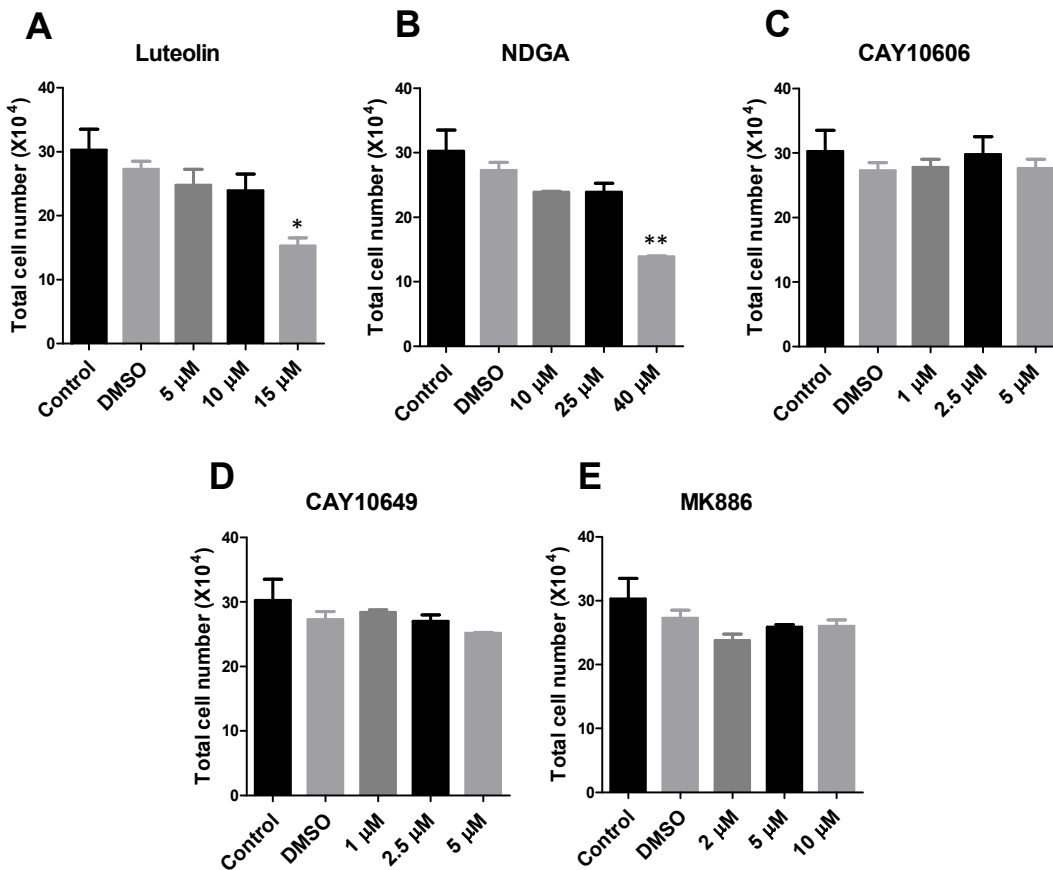

**Supplementary 4. Cell counts of U251-MG** treated with Luteolin, NDGA, CAY10606, CAY10649, MK886, CAY10678 and CAY10526 at different concentrations (A, B, C, D and E). Graphs show cell number after 72 hours, with the data analysis in relation to the control. No significance was found with any of the 5-LOX inhibitors. Both Luteolin and NDGA reduced cell population at higher concentrations (A and B).  $p < 0.05$  (\*),  $p < 0.01$  (\*\*),  $p < 0.001$  (\*\*\*). N = 3, in duplicate.

## U87-MG

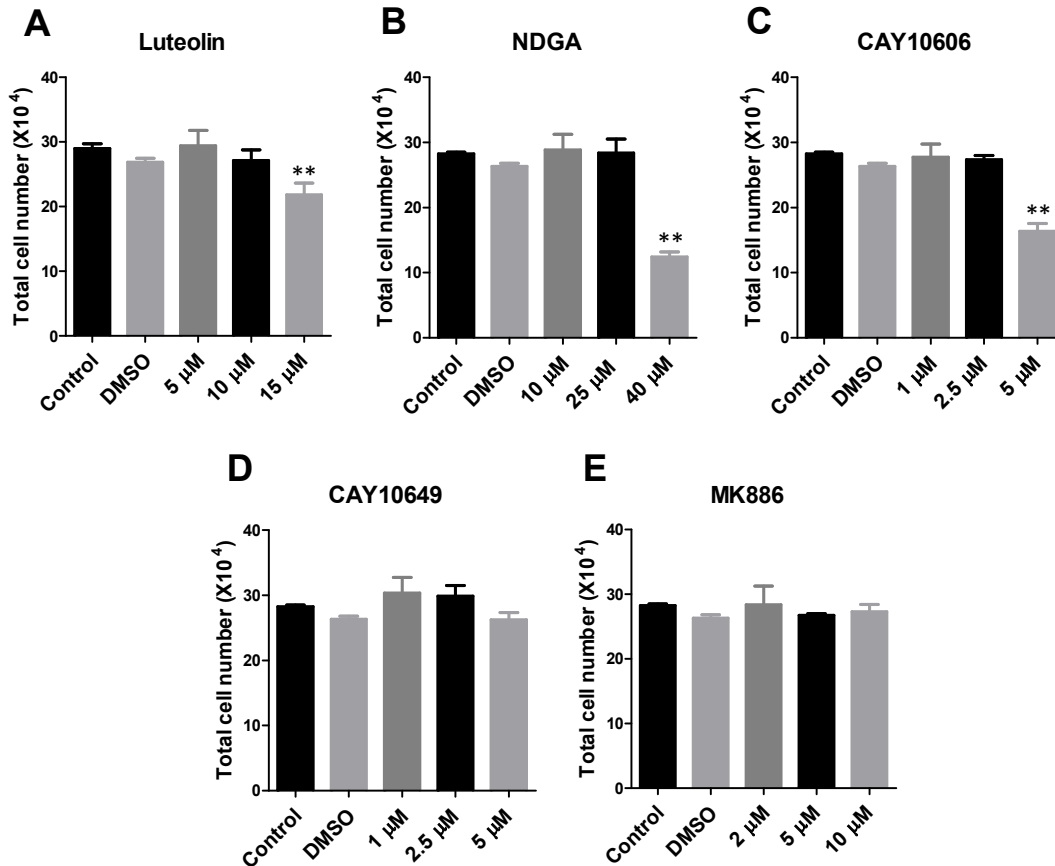

**Supplementary 5. Cell counts of U87-MG** treated with Luteolin, NDGA, CAY10606, CAY10649, MK886, CAY10678 and CAY10526 at different concentrations (A, B, C, D and E). Histograms show cell number after 72 hours, with the data analysis in relation to the control. No significance was found with any of the 5-LOX inhibitors, except CAY10606 (C). Both Luteolin and NDGA reduced cell population at higher concentrations (A and B).  $p < 0.05$  (\*),  $p < 0.01$  (\*\*),  $p < 0.001$  (\*\*\*). N = 3, in duplicate.

## A172

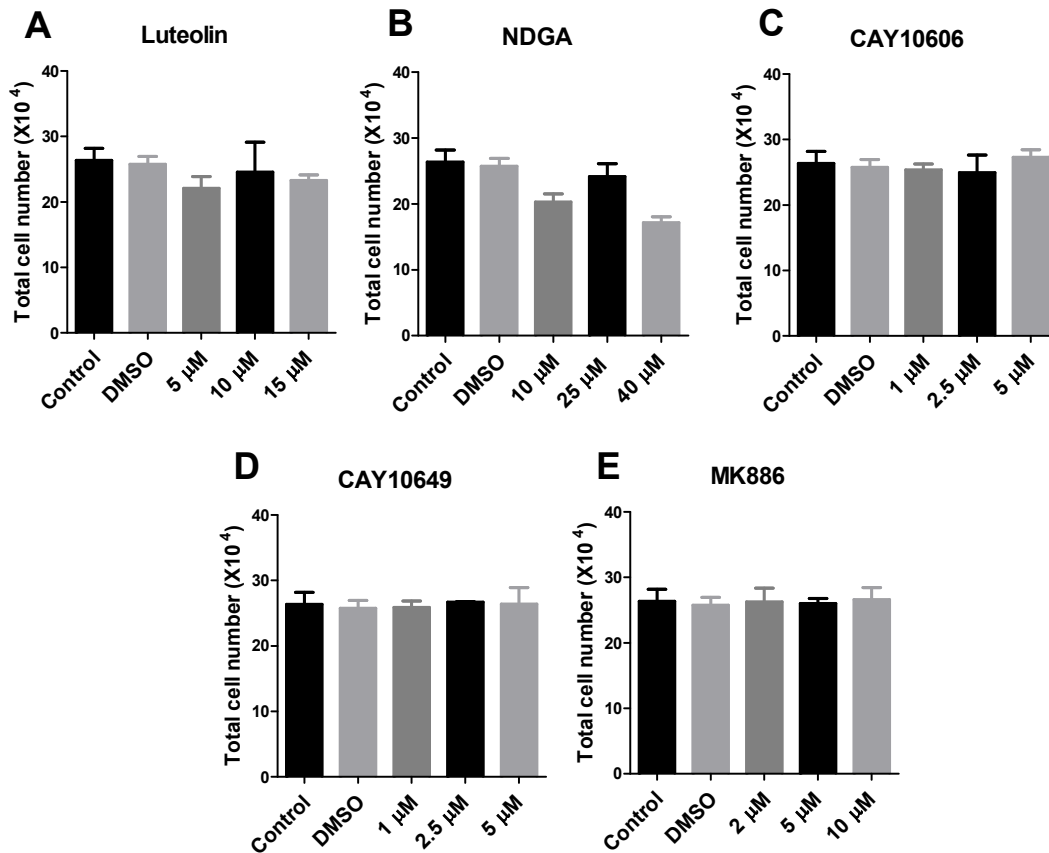

**Supplementary 6. Cell counts of A172** treated with Luteolin, NDGA, CAY10606, CAY10649, and MK886 at different concentrations (A, B, C, D and E). Histograms show cell number after 72 hours, with the data analysis in relation to the control. No significance was found with any of the inhibitors. N = 3, in duplicate.

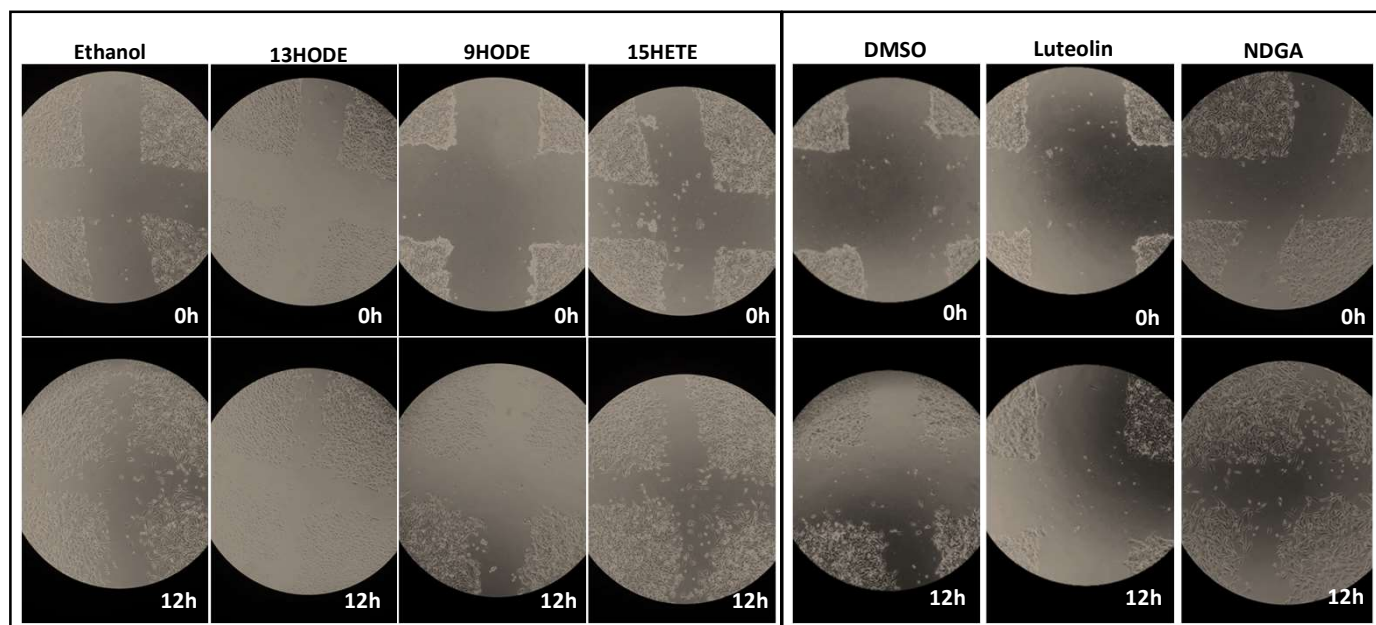

**Supplementary Figure 7. Representative images of wound healing assay** of cells treated with 13-/9-HODE/15-HETE and their respective controls at 0 h and 12 h, and representative photos of Luteolin/NDGA and their controls at 0 h and 12 h. N=3.
